# Supplementary material
Source: Research Square preprint supplement (doi:10.21203/rs.3.rs-7956669/v1)
Supplement: Supplementary file 1 [file 1026c9f9c096f54a12ccfa48.docx]

| Section A: Biographical Information | | | | | | | | | | |
| --- | --- | --- | --- | --- | --- | --- | --- | --- | --- | --- |
| **No. S.** | | **Demographic issues** | **Responses and coding** | |  | | | | **Code** | |
| 101 | | Your age on your last birthday. | in YEARS =........................ | |  | | | |  | |
| 102 | | Where do you live? | 1= Rural  2 = Urban | |  | | | |  | |
| 103 | | Religion | 1 =  orthodox  2 = Muslim  3 = Other (specify) | |  | | | |  | |
| 105 | | What is your birth order? | .................. | |  | | | |  | |
| 106 | | What is your marital status? | 1=single  2=Married  3=Divorced  4 = Widower | | If it's a single person, skip to question #111. | | | |  | |
| 107 | | If you are not single, indicate the circumstances of the marriage. | 1=Forced by parents  2 = Volunteer  3=Failure at school  4=Pregnancy  5=Other (specify) | |  | | | |  | |
| 108 | | How old were you at the wedding? | In years  ........................ | |  | | | |  | |
| 109 | | How old was your husband when you got married? | In years  ........................ | |  | | | |  | |
| 110 | | What is your husband's school status? | 1 = impossible to write and read  2=Level 1-4  3 = 5th to 8th grade  4 = 9th-10th year  5 = 11th-12th grade  6=College and Higher Education  7=I don't know | |  | | | |  | |
| 111 | | Have you already started formal education? | 1=yes  2=no | | If not, proceed to question #116 | | | |  | |
| 112 | | If so, what is your level of education? | 1=Level 1-4  2 = 5th to 8th grade  3 = 9th-10th year  4 = 11th-12th grade  5=College and higher education | |  | | | |  | |
| 113 | | Are you currently enrolled in school? | 1=yes  2 = no | | If not, proceed to question #115 | | | |  | |
| 114 | | If so, do you participate in a school club? | 1=yes  2=no | |  | | | |  | |
| 115 | | What is the reason? | 1=Academic failure  2=Lack of funds  3=Pregnancy  4=Family responsibility  5=The school is not available nearby  6=No parental support | |  | | | |  | |
| 116 | | Who are you currently living with? | 1=Both parents  2=Father only  3= Mother only  4=Husband  5=Guardians/adoptive parents | |  | | | |  | |
| 117 | | If you don't live with both of your parents, why? | 1 = Both parents are dead  2=both parents work far away  3=mother working far away  4=father working far away  5 = a deceased parent (specify)..................  6=Divorced  7=Already married (family responsibilities) | |  | | | |  | |
| 118 | | How many members of your family live with you? (including yourself) (During marriage if married) | 1= <3  2 = 4-6  3= >7  4 = I don't remember | |  | | | |  | |
| 119 | | What is your father's educational status? | 1 = impossible to write and read  2=Level 1-4  3 = 5th to 8th grade  4 = 9th-10th year  5 = 11th-12th grade  6=College and Higher Education  7=I don't know | |  | | | |  | |
| 120 | | What is your mother's educational status? | 1 = impossible to write and read  2=Level 1-4  3 = 5th to 8th grade  4 = 9th-10th year  5 = 11th-12th grade  6=College and Higher Education  7=I don't know | |  | | | |  | |
| 121 | | What kind of work does your father do? | 1=Farmer  2=Daily  3=Employee  4=Merchant  5=other (specify) | |  | | | |  | |
| 122 | | What kind of work does your mother do? | 1=Farmer  2=Housewife  3=Employee  4=Merchant  5=other (specify) | |  | | | |  | |
| 123 | | Average monthly family income | ........................birr | |  | | | |  | |
| 124 | | Do you have a television at home? | 1=yes  2=no | |  | | | |  | |
| 125 | | Do you have a radio at home? | 1=yes  2=no | |  | | | |  | |
| 126 | | If so, do you watch television/listen to the radio? | 1=yes  2=no | |  | | | |  | |
| 127 | | If so, how many times per week? | 1 = twice  2 = three times  3=>three times  4 = once | |  | | | |  | |
| 128 | | How long does it take to walk to the nearest healthcare facility? | 1=<15 minutes  2 = 15-30 minutes  3 = 30-45 minutes  4 = 45-60 minutes  5= >1 hour | |  | | | |  | |
| 129 | | How long does it take to walk to the nearest school? | 1=<15 minutes  2 = 15-30 minutes  3 = 30-45 minutes  4 = 45-60 minutes  5= >1 hour | |  | | | |  | |
| Section B: Information on sexuality and reproductive health issues | | | | | | | | | | |
| 201 | Have you had your period? | | | 1 = yes  2 = no | | If not, proceed to Q #206 | | | |  |
| 202 | If so, how old were you when you got your first period? | | | ..............year | |  | | | |  |
| 203 | Did you get your period last month? | | | 1=yes  2=no | | If not, proceed to Q 206 | | | |  |
| 204 | If so, do you remember the day of your last normal period? | | | 1=yes  2=no | |  | | | |  |
| 205 | If so, when was your last period? | | | Date/Month..................../................................. | |  | | | |  |
| 206 | Have you ever discussed topics such as menstruation, preventing premarital sex, HIV/AIDS, and teenage pregnancy with at least one of your parents? | | | 1=Yes  2=No | | If not, proceed to Q 208 | | | |  |
| 207 | If so, what issue does it relate to? | | | .......................  ......................................  ....................... | |  | | | |  |
| 208 | Have you already received any information about the rules? | | | 1 = yes  2 = no | | If not, proceed to Q 212 | | | |  |
| 209 | If so, when did you obtain the information? | | | 1=before the rules  2=after the rules | |  | | | |  |
| 210 | Who gave you the information? | | | 1=mother  2=Friend  3=prof  4=Healthcare professionals  5=Father 6=Other (specify)............... | |  | | | |  |
| 211 | What information have you received regarding menstruation? (please list) | | | 1=It's a curse  2=It's painful  3=You are ready to have a pregnancy. 4=You are ready to get married.  5 = About hygiene  6=Avoid sexual intercourse  7=Other (please specify)........................... | |  | | | |  |
| 212 | Have you ever been pregnant? | | | 1=yes  2=no | | If not, proceed to question #215 | | | |  |
| 213 | If so, how old were you during your first pregnancy? | | | Years =................................. | |  | | | |  |
| 214 | Was it a planned pregnancy? | | | 1 = yes  2 = no | |  | | | |  |
| 215 | Are you currently pregnant? | | | 1=yes  2=no | | If not, skip to Q 221 | | | |  |
| 216 | If so; Have you started prenatal care? | | | 1=yes  2=no | | If not, skip to Q 219 | | | |  |
| 217 | If so, where is it? | | | 1=health post  2=health center  3=hospital  4=private clinic | |  | | | |  |
| 218 | When did you make your reservation with the ANC? | | | 1=Before /at 16 weeks  2=After 16 weeks | |  | | | |  |
| 219 | Was this pregnancy planned? | | | 1 = yes  2 = no | |  | | | |  |
| 220 | If Q 216 is no; Why? | | | 1 = The healthcare facility is too far away  2=Families do not allow it  3 = fear of healthcare professionals  4=other (specify).................................. | |  | | | |  |
| 221 | Have you ever had sexual intercourse? (For single people); | | | 1=yes  2 = no | | If not, skip to Q 226 | | | |  |
| 222 | At what age did you have your first sexual intercourse? | | | 1 = Less than 10  2=10-12  3=13-14  4=15-17  5=18-19 | |  | | | |  |
| 223 | What led you to have sexual relations? | | | 1 = Desire for self  2=Peer pressure  3=Parental pressure  4=Partner pressure  5 = Getting pregnant  6=Violence | |  | | | |  |
| 224 | How old was your sexual partner when you first had sex? | | | Years =................................. | |  | | | |  |
| 225 | How many sexual partners have you had? | | | ....................... | |  | | | |  |
| 226 | Has she ever received sex education at your school? (if she has a formal education) | | | 1=yes  2=no | |  | | | |  |
| 227 | Did your mother have a history of teenage pregnancy? | | | 1=yes  2=no | |  | | | |  |
| 228 | Do you have a sister with a history of teenage pregnancy? | | | 1=yes  2=no | |  | | | |  |
| **Section C: Knowledge about achieving and preventing pregnancies in adolescents** | | | | | | | | | | |
| 301 | When is a woman likely to become pregnant? | | | 1 = 14 days before menstruation, within +3 days  2 = 14 days after menstruation within +3 days  3=During menstruation  4=At any time | | |  |  | | |
| 302 | What are the risks/dangers of engaging in sexual relations at an early age? | | | 1 = Failure at school  2 = Becoming pregnant  3=STI/HIV/AIDS Contract  4 = Expelled from the community | | |  |  | | |
| 303 | How to prevent pregnancy, sexually transmitted diseases and HIV/AIDS? | | | 1=By abstaining from all sexual activity  2=Use contraceptives  3=Have regular medical check-ups  4=Having only one sexual partner  5=Other (please specify) | | |  |  | | |
| 304 | In your opinion, what is the youngest age at which you consider there is a risk of becoming pregnant? | | | 1=20 years  2=18 years  3 = 17 years old  4 = 16 years old  5=15 years  6=14 years old  7 = 13 years and under | | |  |  | | |
| 305 | Have you heard of contraceptive methods? | | | 1=yes  2=no | | |  |  | | |
| 306 | If so, mention some of the methods you know | | | .......................................  ....................................... | | |  |  | | |
| 307 | Which contraceptive method prevents pregnancy and sexually transmitted diseases? | | | 1=Intrauterine device  2=Pills  3 = Condom  4=Natural Method/Rhythm | | |  |  | | |
| 308 | Where are contraceptives available? | | | 1=Healthcare facilities  2=Pharmacy  3= Market Square  4=In schools  5=Other (specify).......... | | |  |  | | |
| 309 | Have you ever used a contraceptive method? | | | 1=yes  2=no | | |  |  | | |
| 310 | Are you currently using contraception? | | | 1=yes  2=no | | |  |  | | |
| 311 | If so, who decides to use the method? | | | 1=Auto-only  2=with partner  3=partner only  4=other (specify)............... | | |  |  | | |
| 312 | What method did you use? | | | 1=Pills  2=Injectable  3=Traditional Contraceptives  4=Other (please specify) | | |  |  | | |
